# Supplementary material
Source: Research Square preprint supplement (doi:10.21203/rs.3.rs-8428920/v1)
Supplement: Supplementary file 1 [file 1f75baeb55d2d1c70dc72cbf.docx]

| **Characteristic** | **CU** | **MCI** | **AD** |
| --- | --- | --- | --- |
| **Number** | 142 | 34 | 44 |
| **Mean age, years (SD)** | 68.77 (7.99) | 70.97 (7.99) | 65.89 (7.86) |
| **Female, number (%)** | 85 (59.85) | 18 (52.94) | 19 (43.18) |
| **Mean education, years (SD)** | 15.42 (3.58) | 15.78 (3.49) | 14.56 (3.60) |
| **Mean MMSE score, (SD)** | 29.20 (0.87) | 27.93 (4.30) | 20.05 (12.75) |
| **Mean CDR scores, (SD)** | 0 (0) | 0.5 (0) | 0.83 (0.17) |
| **APOE ε4, number (%)** | 37 (26.05) | 23 (67.64) | 25 (56.81) |
| **Total amyloid SUVR1, mean (SD)** | 1.25 (0.37) | 2.32 (0.57) | 2.29 (0.58) |
| **Total tau SUVR2, mean (SD)** | 1.12 (0.23) | 1.45 (0.67) | 2.36 (0.70) |

**Table 1.** Demographic characteristics of participants recruited in the current study.

1Amyloid cutoff = 1.55 SUVR Neocortex

2Tau cutoff = 1.18 SUVR MetaROI
